# Supplementary material for: Techno-economic performances and life cycle greenhouse gas emissions of various ammonia production pathways including conventional, carbon-capturing, nuclear-powered, and renewable production
Source: Royal Society of Chemistry journal article supplement (doi:10.1039/d2gc00843b), 2022-01-01
Supplement: d2gc00843b1.pdf [file d2gc00843b1.pdf]

## Supplementary Information: Techno-economic performances and life cycle greenhouse gas emissions of various ammonia production pathways including conventional, carbon-capturing, nuclear-powered, and renewable production

Kyuha Lee,\* Xinyu Liu, Pradeep Vyawahare, Pingping Sun, Amgad Elgowainy and Michael Wang

Systems Assessment Center, Energy Systems Division, Argonne National Laboratory, USA

E-mail: [kyuha.lee@anl.gov](mailto:kyuha.lee@anl.gov)

### S1. Assumptions for techno-economic analysis

The assumptions for techno-economic analysis (TEA) are listed in Table S1. In this work, a plant life and analysis period of 40 years is assumed, which is consistent with existing studies of clean H<sub>2</sub> production.<sup>1,2</sup> The 8% real IRR (internal rate of return) value was employed based on the return-on-equity statistics (adjusted for inflation) from Praxair, Inc., and Air Products and Chemicals, Inc., during the period 2009–2017.<sup>3</sup> The demand for ammonia produced from various pathways is assumed to be significant in the future. Additional details are available in reference.<sup>3</sup>

**Table S1** Economic analysis assumptions.

| Parameter                                                   | Value              |
|-------------------------------------------------------------|--------------------|
| Reference year                                              | 2016               |
| Length of construction period (years)                       | 3                  |
| % of capital spent in 1st year of construction              | 8                  |
| % of capital spent in 2nd year of construction              | 60                 |
| % of capital spent in 3rd year of construction              | 32                 |
| Start-up time (years)                                       | 1                  |
| Plant life (years)                                          | 40                 |
| Analysis period (years)                                     | 40                 |
| Depreciation schedule length (years)                        | 20                 |
| Depreciation type                                           | MACRS <sup>a</sup> |
| % equity financing                                          | 40                 |
| Interest rate on debt, if applicable (%)                    | 3.7                |
| Debt period (years)                                         | Constant debt      |
| Fixed operating costs during Start-up (%)                   | 75                 |
| Revenues during start-up (%)                                | 50                 |
| Variable operating costs during start-up (%)                | 75                 |
| Decommissioning costs (% of depreciable capital investment) | 10                 |
| Salvage value (% of total capital investment)               | 10                 |
| Inflation rate (%)                                          | 1.9                |
| After-tax real IRR <sup>b</sup> (%)                         | 8                  |
| State taxes (%)                                             | 6                  |
| Federal taxes (%)                                           | 21                 |
| Total tax rate (%)                                          | 25.74              |
| Working capital (% of yearly change in operating costs)     | 15                 |

<sup>a</sup> MACRS: Modified accelerated cost recovery system. <sup>b</sup> IRR: Internal rate of return.

## S2. Equipment and installation costs

Equipment and installation costs for ammonia production were determined from mass and energy balance results obtained from engineering models using Aspen Process Economic Analyzer. Table S2 shows equipment and installation costs for each process block for NG-based, carbon-capturing, nuclear-powered, and renewable ammonia production.

**Table S2** Equipment and installation costs for process blocks for various ammonia production. All the dollar values are based on 2016 U.S. dollars.

| Process block                                          | Equipment cost (\$) | Installation cost (\$) |
|--------------------------------------------------------|---------------------|------------------------|
| <b>NG-based ammonia production</b>                     | 50,850,800          | 80,771,600             |
| Desulfurization                                        | 103,800             | 666,600                |
| Steam methane reforming                                | 5,571,100           | 6,979,400              |
| Water-gas shift                                        | 987,500             | 2,568,600              |
| CO <sub>2</sub> removal by aMDEA                       | 8,769,800           | 15,279,900             |
| Methanation                                            | 166,500             | 559,400                |
| Haber-Bosch loop                                       | 12,723,100          | 18,378,300             |
| Boiler and steam turbines                              | 13,365,700          | 20,972,300             |
| Utility (cooling and water treatment)                  | 9,163,300           | 15,367,100             |
| <b>Carbon-capturing ammonia production version 1</b>   | 57,152,700          | 89,307,000             |
| Desulfurization                                        | 103,800             | 666,600                |
| Steam methane reforming                                | 5,571,100           | 6,979,400              |
| Water-gas shift                                        | 987,500             | 2,568,600              |
| CO <sub>2</sub> capture by aMDEA                       | 8,769,800           | 15,279,900             |
| CO <sub>2</sub> compression and cooling                | 6,227,000           | 8,397,900              |
| Methanation                                            | 166,500             | 559,400                |
| Haber-Bosch loop                                       | 12,723,100          | 18,378,300             |
| Boiler and steam turbines                              | 13,365,700          | 20,972,300             |
| Utility (cooling and water treatment)                  | 9,238,200           | 15,504,600             |
| <b>Carbon-capturing ammonia production version 2</b>   | 127,939,200         | 211,236,900            |
| Desulfurization                                        | 103,800             | 666,600                |
| Steam methane reforming                                | 5,571,100           | 6,979,400              |
| Water-gas shift                                        | 987,500             | 2,568,600              |
| CO <sub>2</sub> capture by aMDEA                       | 8,769,800           | 15,279,900             |
| CO <sub>2</sub> capture by Cansolv                     | 69,727,500          | 120,280,000            |
| CO <sub>2</sub> compression and cooling                | 8,191,100           | 11,098,600             |
| Methanation                                            | 166,500             | 559,400                |
| Haber-Bosch loop                                       | 12,723,100          | 18,378,300             |
| Boiler and steam turbines                              | 12,446,400          | 19,895,400             |
| Utility (cooling and water treatment)                  | 9,252,400           | 15,530,700             |
| <b>Nuclear-powered or renewable ammonia production</b> | 38,285,300          | 53,017,200             |
| Air separation by cryogenic distillation               | 18,056,200          | 22,506,100             |
| Haber-Bosch loop                                       | 13,061,000          | 18,642,800             |
| Boiler and steam turbines                              | 4,657,900           | 7,069,100              |
| Utility (cooling tower)                                | 2,510,200           | 4,799,200              |

### S3. Costs of utility, byproduct, and catalysts

Table S3 summarizes the costs of feedstock, utility, byproduct, and catalysts used for various ammonia production. The cost of clean hydrogen is described in the main paper. All the dollar values are based on 2016 U.S. dollars.

**Table S3** Costs of utility, byproduct, and catalysts used in this work. All the dollar values are based on 2016 U.S. dollars.

| Feedstock, utility, byproduct, or catalyst  | Cost   | Reference |
|---------------------------------------------|--------|-----------|
| Industrial electricity (\$/kWh)             | 0.07   | [4]       |
| Industrial NG (\$/MMBtu–LHV <sup>a</sup> )  | 4.24   | [4]       |
| Cooling water (\$/gal)                      | 0.0001 | [3]       |
| Oxygen byproduct (\$/kg)                    | 0.03   | [3]       |
| ZnO adsorbent (\$/kg)                       | 2.88   | [5]       |
| Catalyst (primary reformer)                 | 16.5   | [6]       |
| Catalyst (secondary reformer)               | 16.5   | [6]       |
| Catalyst (high temperature water-gas shift) | 20.2   | [6]       |
| Catalyst (low temperature water-gas shift)  | 22.6   | [6]       |
| Catalyst (methanation)                      | 16.5   | [6]       |
| Catalyst (Haber-Bosch ammonia synthesis)    | 23.2   | [6]       |

<sup>a</sup> LHV: Low heating value.

### S4. CO<sub>2</sub> pipeline transportation costs

CO<sub>2</sub> pipeline transportation costs are estimated using the National Energy Technology Laboratory (NETL)'s CO<sub>2</sub> transport cost model.<sup>7</sup> Table S4 shows the financial inputs used in the cost model to estimate the CO<sub>2</sub> pipeline transportation costs.

**Table S4** Financial inputs used in the CO<sub>2</sub> transport cost model.

| Parameter                                | Value                         |
|------------------------------------------|-------------------------------|
| Capitalization                           | 50%                           |
| Cost of equity                           | 12%                           |
| Cost of debt                             | 4.5%                          |
| Tax rate                                 | 25.7%                         |
| Escalation rate                          | 3%                            |
| Project contingency factor               | 15%                           |
| Depreciation method                      | DB150 <sup>a</sup> – 15 years |
| Duration of construction in years        | 3                             |
| Duration of operation in years           | 40                            |
| Capacity factor                          | 90%                           |
| Commercial electricity cost (2011\$/MWh) | 102.3                         |

<sup>a</sup> DB150: 150% declining balance.

## S5. Physical values for major streams

Table S5 shows physical values for major streams in the NG-based and nuclear-powered/renewable ammonia production systems.

**Table S5** Physical values for major streams in the NG-based and nuclear-powered/renewable ammonia production systems.

| Pathway                                         | ID              | Major Stream <sup>b</sup>         | T (°C) | P (bar) | Mole Fraction <sup>a</sup> |      |                |                |                 |      |                 |                  |                | Mass Flow (kg/kg NH <sub>3</sub> ) |
|-------------------------------------------------|-----------------|-----------------------------------|--------|---------|----------------------------|------|----------------|----------------|-----------------|------|-----------------|------------------|----------------|------------------------------------|
|                                                 |                 |                                   |        |         | CO <sub>2</sub>            | CO   | H <sub>2</sub> | N <sub>2</sub> | CH <sub>4</sub> | Ar   | NH <sub>3</sub> | H <sub>2</sub> O | O <sub>2</sub> |                                    |
| NG-based<br>NH <sub>3</sub>                     | 1               | Process NG                        | 45.0   | 38.3    | 0.00                       | 0.00 | 0.00           | 0.01           | 0.80            | 0.00 | 0.00            | 0.00             | 0.00           | 0.52                               |
|                                                 | 2               | NG Fuel                           | 47.0   | 1.3     | 0.00                       | 0.00 | 0.00           | 0.01           | 0.80            | 0.00 | 0.00            | 0.00             | 0.00           | 0.17                               |
|                                                 | 3               | Process Steam                     | 360.0  | 35.3    | 0.00                       | 0.00 | 0.00           | 0.00           | 0.00            | 0.00 | 0.00            | 1.00             | 0.00           | 1.93                               |
|                                                 | 4               | SMR Outlet                        | 976.1  | 28.7    | 0.05                       | 0.08 | 0.35           | 0.15           | 0.00            | 0.00 | 0.00            | 0.35             | 0.00           | 3.76                               |
|                                                 | 5               | WGS Outlet                        | 232.7  | 26.5    | 0.13                       | 0.00 | 0.44           | 0.15           | 0.00            | 0.00 | 0.00            | 0.27             | 0.00           | 3.76                               |
|                                                 | 6               | Steam from WGS                    | 407.7  | 111.8   | 0.00                       | 0.00 | 0.00           | 0.00           | 0.00            | 0.00 | 0.00            | 1.00             | 0.00           | 4.32                               |
|                                                 | 7               | aMDEA Outlet                      | 41.6   | 26.5    | 0.00                       | 0.00 | 0.75           | 0.24           | 0.00            | 0.00 | 0.00            | 0.00             | 0.00           | 1.16                               |
|                                                 | 8               | CO <sub>2</sub> from aMDEA        | 15     | 2.9     | 0.97                       | 0.00 | 0.00           | 0.00           | 0.01            | 0.01 | 0.00            | 0.01             | 0.00           | 1.32                               |
|                                                 | 9               | Make-up Feed Gas                  | 280.0  | 26.5    | 0.00                       | 0.00 | 0.75           | 0.25           | 0.00            | 0.00 | 0.00            | 0.00             | 0.00           | 1.13                               |
|                                                 | 10              | Recycle Feed                      | 14.7   | 275.0   | 0.00                       | 0.00 | 0.64           | 0.20           | 0.04            | 0.00 | 0.12            | 0.00             | 0.00           | 2.47                               |
|                                                 | 11              | Liquid Condensate 1               | 12.2   | 274.5   | 0.00                       | 0.00 | 0.01           | 0.00           | 0.00            | 0.00 | 0.98            | 0.00             | 0.00           | 0.23                               |
|                                                 | 12              | Reactor Inlet Gas                 | 180.0  | 292.0   | 0.00                       | 0.00 | 0.70           | 0.23           | 0.03            | 0.00 | 0.05            | 0.00             | 0.00           | 3.37                               |
|                                                 | 13              | Reactor Outlet Gas                | 467.1  | 284.0   | 0.00                       | 0.00 | 0.54           | 0.17           | 0.03            | 0.00 | 0.25            | 0.00             | 0.00           | 3.37                               |
|                                                 | 14              | Steam from HB                     | 346.7  | 45.0    | 0.00                       | 0.00 | 0.00           | 0.00           | 0.00            | 0.00 | 0.00            | 1.00             | 0.00           | 0.98                               |
|                                                 | 15              | Liquid Condensate 2               | 45.3   | 275.0   | 0.00                       | 0.00 | 0.02           | 0.01           | 0.00            | 0.00 | 0.97            | 0.00             | 0.00           | 0.84                               |
|                                                 | 16              | Liquid NH <sub>3</sub> Product    | 37.4   | 20.0    | 0.00                       | 0.00 | 0.00           | 0.00           | 0.00            | 0.00 | 1.00            | 0.00             | 0.00           | 1.00                               |
|                                                 | 17              | Purge Gas                         | 14.7   | 275.0   | 0.00                       | 0.00 | 0.69           | 0.22           | 0.04            | 0.00 | 0.05            | 0.00             | 0.00           | 0.07                               |
|                                                 | 18              | Boiler Flue Gas                   | 43.0   | 1.0     | 0.09                       | 0.00 | 0.00           | 0.81           | 0.00            | 0.01 | 0.00            | 0.07             | 0.02           | 3.73                               |
| Nuclear-powered or renewable<br>NH <sub>3</sub> | 19              | N <sub>2</sub> Feed from ASU      | 30.0   | 20.0    | 0.00                       | 0.00 | 0.00           | 0.99           | 0.00            | 0.01 | 0.00            | 0.00             | 0.00           | 0.93                               |
|                                                 | 20              | O <sub>2</sub> Byproduct from ASU | 28.8   | 4.7     | 0.00                       | 0.00 | 0.00           | 0.00           | 0.00            | 0.03 | 0.00            | 0.00             | 0.97           | 0.29                               |
|                                                 | 9               | Make-up Feed Gas                  | 25.8   | 20.0    | 0.00                       | 0.00 | 0.75           | 0.25           | 0.00            | 0.00 | 0.00            | 0.00             | 0.00           | 1.13                               |
|                                                 | 10              | Recycle Feed                      | 7.5    | 275.0   | 0.00                       | 0.00 | 0.63           | 0.24           | 0.00            | 0.02 | 0.11            | 0.00             | 0.00           | 2.60                               |
|                                                 | 11              | Liquid Condensate 1               | 7.2    | 274.5   | 0.00                       | 0.00 | 0.01           | 0.00           | 0.00            | 0.00 | 0.99            | 0.00             | 0.00           | 0.23                               |
|                                                 | 12              | Reactor Inlet Gas                 | 180.0  | 292.0   | 0.00                       | 0.00 | 0.69           | 0.25           | 0.00            | 0.01 | 0.04            | 0.00             | 0.00           | 3.50                               |
|                                                 | 13              | Reactor Outlet Gas                | 482.4  | 284.0   | 0.00                       | 0.00 | 0.53           | 0.20           | 0.00            | 0.01 | 0.25            | 0.00             | 0.00           | 3.50                               |
|                                                 | 14              | Liquid Condensate 2               | 43.2   | 275.0   | 0.00                       | 0.00 | 0.02           | 0.01           | 0.00            | 0.00 | 0.97            | 0.00             | 0.00           | 0.83                               |
|                                                 | 15              | Steam from HB                     | 347.4  | 45.0    | 0.00                       | 0.00 | 0.00           | 0.00           | 0.00            | 0.00 | 0.00            | 1.00             | 0.00           | 0.98                               |
|                                                 | 16              | Liquid NH <sub>3</sub> Product    | 35.9   | 20.0    | 0.00                       | 0.00 | 0.00           | 0.00           | 0.00            | 0.00 | 1.00            | 0.00             | 0.00           | 1.00                               |
| 17                                              | Purge Gas       | 7.5                               | 275.0  | 0.00    | 0.00                       | 0.68 | 0.26           | 0.00           | 0.02            | 0.04 | 0.00            | 0.00             | 0.07           |                                    |
| 18                                              | Boiler Flue Gas | 43.0                              | 1.0    | 0.00    | 0.00                       | 0.00 | 0.88           | 0.00           | 0.02            | 0.00 | 0.07            | 0.03             | 0.49           |                                    |

<sup>a</sup> For the mole fraction of NG, hydrocarbons higher than CH<sub>4</sub> are not shown.

<sup>b</sup> SMR = steam methane reforming. WGS = water-gas shift. aMDEA = activated methyl diethanolamine. HB = Haber-Bosch. ASU = air separation units.

## S6. Carbon balance for NG-based and carbon-capturing ammonia production

Table S6 shows the carbon balance for NG-based and carbon-capturing ammonia production.

**Table S6** Carbon balance for NG-based and carbon-capturing ammonia production. The unit of all values is kmol-C/hr.

| Major Stream <sup>a</sup>  | NG-based NH <sub>3</sub> |        |                 |                                        | Carbon-capturing NH <sub>3</sub> v1 |        |                 |                                        | Carbon-capturing NH <sub>3</sub> v2 |        |                 |                                        |
|----------------------------|--------------------------|--------|-----------------|----------------------------------------|-------------------------------------|--------|-----------------|----------------------------------------|-------------------------------------|--------|-----------------|----------------------------------------|
|                            | CO <sub>2</sub>          | CO     | CH <sub>4</sub> | C <sub>n</sub> H <sub>m</sub><br>(n≥2) | CO <sub>2</sub>                     | CO     | CH <sub>4</sub> | C <sub>n</sub> H <sub>m</sub><br>(n≥2) | CO <sub>2</sub>                     | CO     | CH <sub>4</sub> | C <sub>n</sub> H <sub>m</sub><br>(n≥2) |
| Process NG                 | 0                        | 0      | 1143.5          | 567.9                                  | 0                                   | 0      | 1143.5          | 567.9                                  | 0                                   | 0      | 1143.5          | 567.9                                  |
| NG fuel                    | 0                        | 0      | 384.7           | 191.2                                  | 0                                   | 0      | 384.7           | 191.2                                  | 0                                   | 0      | 384.7           | 191.2                                  |
| Process and combustion air | 2.8                      | 0      | 0               | 0                                      | 2.8                                 | 0      | 0               | 0                                      | 2.8                                 | 0      | 0               | 0                                      |
| Pre-SMR outlet             | 1.4                      | 99.1   | 1610.9          | 0                                      | 1.4                                 | 99.1   | 1610.9          | 0                                      | 1.4                                 | 99.1   | 1610.9          | 0                                      |
| Primary SMR outlet         | 598.3                    | 524.0  | 589.0           | 0                                      | 598.3                               | 524.0  | 589.0           | 0                                      | 598.3                               | 524.0  | 589.0           | 0                                      |
| Secondary SMR outlet       | 628.6                    | 1036.9 | 46.6            | 0                                      | 628.6                               | 1036.9 | 46.6            | 0                                      | 628.6                               | 1036.9 | 46.6            | 0                                      |
| HT WGS outlet              | 1393.9                   | 271.6  | 46.6            | 0                                      | 1393.9                              | 271.6  | 46.6            | 0                                      | 1393.9                              | 271.6  | 46.6            | 0                                      |
| LT WGS outlet              | 1638.5                   | 27.1   | 46.6            | 0                                      | 1638.5                              | 27.1   | 46.6            | 0                                      | 1638.5                              | 27.1   | 46.6            | 0                                      |
| aMDEA outlet               | 0                        | 27.1   | 0               | 0                                      | 0                                   | 27.1   | 0               | 0                                      | 0                                   | 27.1   | 0               | 0                                      |
| Methanation outlet         | 0                        | 0      | 26.7            | 0                                      | 0                                   | 0      | 26.7            | 0                                      | 0                                   | 0      | 26.7            | 0                                      |
| Process gas emissions      | 1638.1                   | 0.1    | 47.2            | 0                                      | 78.6                                | 0.1    | 26.1            | 0                                      | 78.6                                | 0.1    | 26.1            | 0                                      |
| Flue gas emissions         | 604.6                    | 0      | 0               | 0                                      | 604.6                               | 0      | 0               | 0                                      | 60.5                                | 0      | 0               | 0                                      |
| NH <sub>3</sub> product    | 0                        | 0      | 1.5             | 0                                      | 0                                   | 0      | 1.5             | 0                                      | 0                                   | 0      | 1.5             | 0                                      |
| Captured CO <sub>2</sub>   | 0                        | 0      | 0               | 0                                      | 1559.6                              | <0.1   | 21.1            | 0                                      | 2103.7                              | <0.1   | 21.1            | 0                                      |

<sup>a</sup> SMR = steam methane reforming. HT WGS = high-temperature water-gas shift. LT WGS = low-temperature water-gas shift. aMDEA = activated methyl diethanolamine.

## References

- 1 D. Peterson, J. Vickers and D. DeSantis, *Hydrogen Production Cost From PEM Electrolysis - 2019*, 2020.
- 2 D. Peterson, J. Vickers and D. DeSantis, *Hydrogen Production Cost From High Temperature Electrolysis – 2020*, 2020.
- 3 M. Penev, G. Saur, C. Hunter and J. Zuboy, *H2A Hydrogen Production Model : Version 3 . 2018 User Guide*, 2018.
- 4 U.S. Energy Information Administration (EIA), Annual Energy Outlook 2021, <https://www.eia.gov/outlooks/aeo/>.
- 5 <https://www.alibaba.com>.
- 6 H. Zhang, L. Wang, J. Van herle, F. Maréchal and U. Desideri, *Appl. Energy*, 2020, **259**, 114135.
- 7 D. Morgan and T. Grant, *FE/NETL CO2 Transport Cost Model (2018): Description and User's Manual*, 2018.
